# Supplementary material for: The Evolution of Morphospace in Phytophagous Scarab Chafers: No Competition - No Divergence?
Source: PLOS journal article supplement (doi:10.1371/journal.pone.0098536), 2014-05-29
Supplement: S14 (10.1371/journal.pone.0098536.s014) [file journal.pone.0098536.s014]

**Table S9. The impact of size.** Percentage of variation explained by size alone (PVESA) within the subsets.

| <b>Taxa subset</b> | <b>PVESA (%)</b> |
|--------------------|------------------|
| 1                  | 88.4             |
| 1*                 | 82.4             |
| 2                  | 85.2             |
| 3                  | 89.5             |
| 4                  | 88.5             |
| 5                  | 88.4             |

\* without *Microvalgus*
